# Supplementary material
Source: PubMed Central journal article supplement (PMC6803309)
Supplement: AEM.01773-19-s0001.pdf [file AEM.01773-19-s0001.pdf]

## 1 Supplemental Material

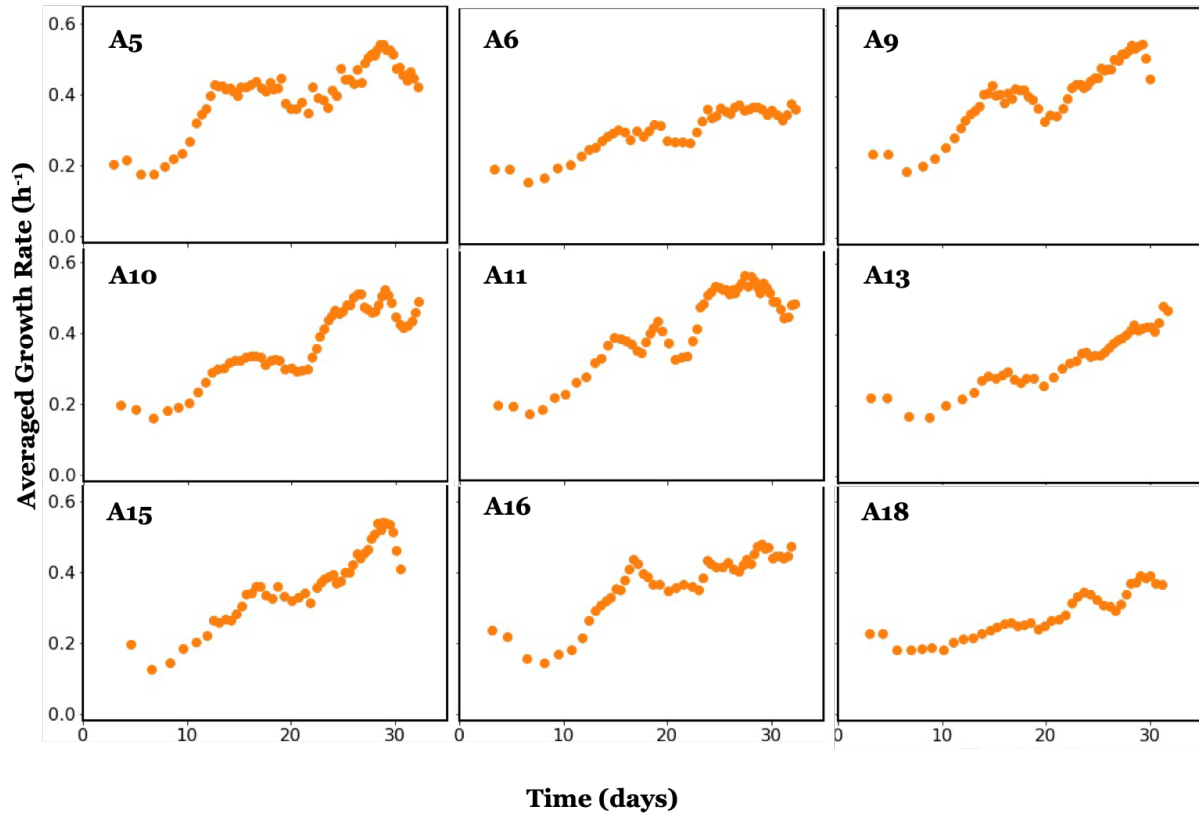

2

3 **Fig. S1.** Fitness trajectories of other replicates for the ALE experiment on SMM. A5, A6,  
4 A9 and A10 are biological replicates of *S. aureus* USA300 LAC. A11, A13, A15, A16 and  
5 A18 are biological replicates of USA300 TCH1516. All strains demonstrated fitness  
6 increase over the course of the experiment.

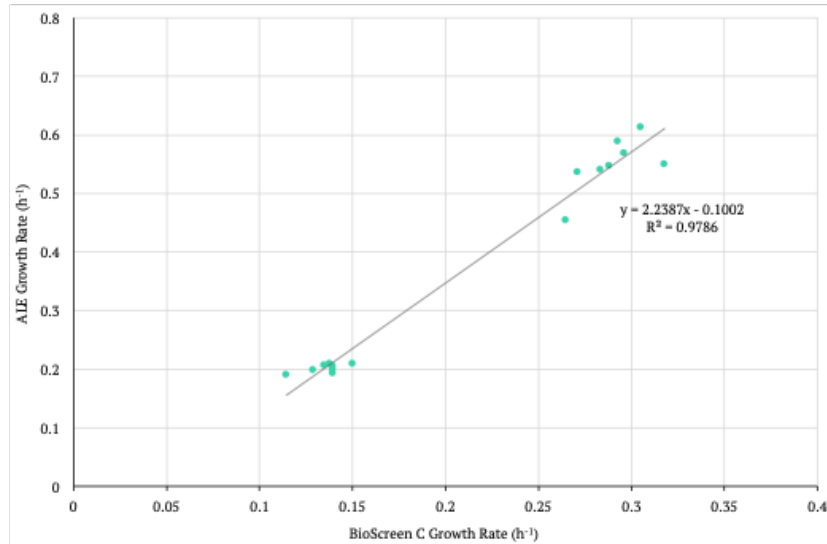

7

8 **Fig. S2.** Correlation of growth rates calculated from growth curves performed using the  
 9 ALE machine and the BioScreen C (A). The aeration is higher in the ALE machine  
 10 compared to the BioScreen C.

11

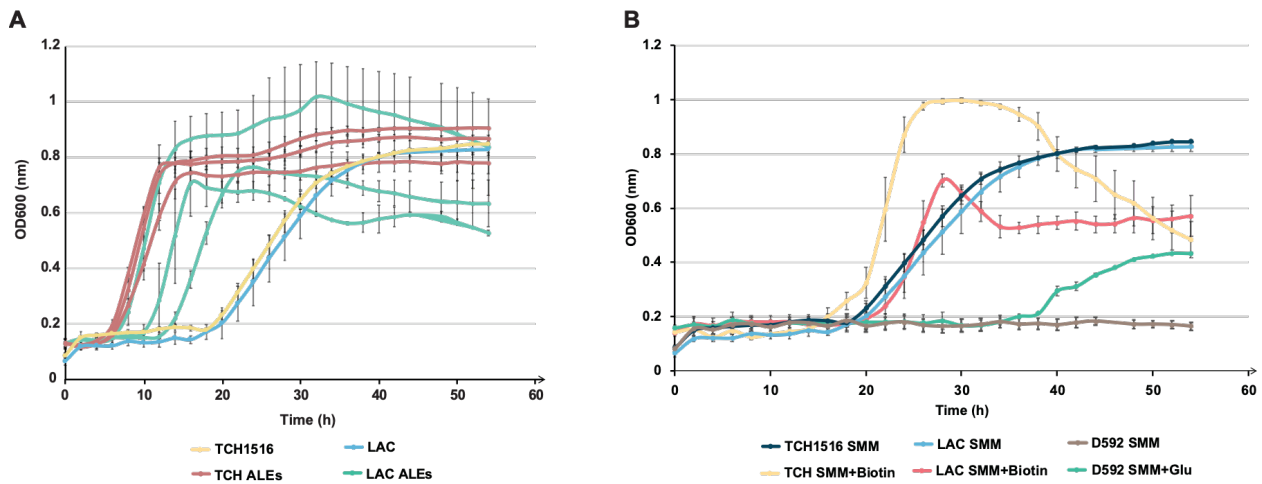

12

13

14 **Fig. S3.** Growth curves of wild-type and evolved strains in SMM media (A). Growth curves  
 15 of wild type strains in SMM supplemented with glutamic acid (SMM + Glu; 250 mg/L) or  
 16 biotin (SMM + Biotin; 0.1 mg/L).

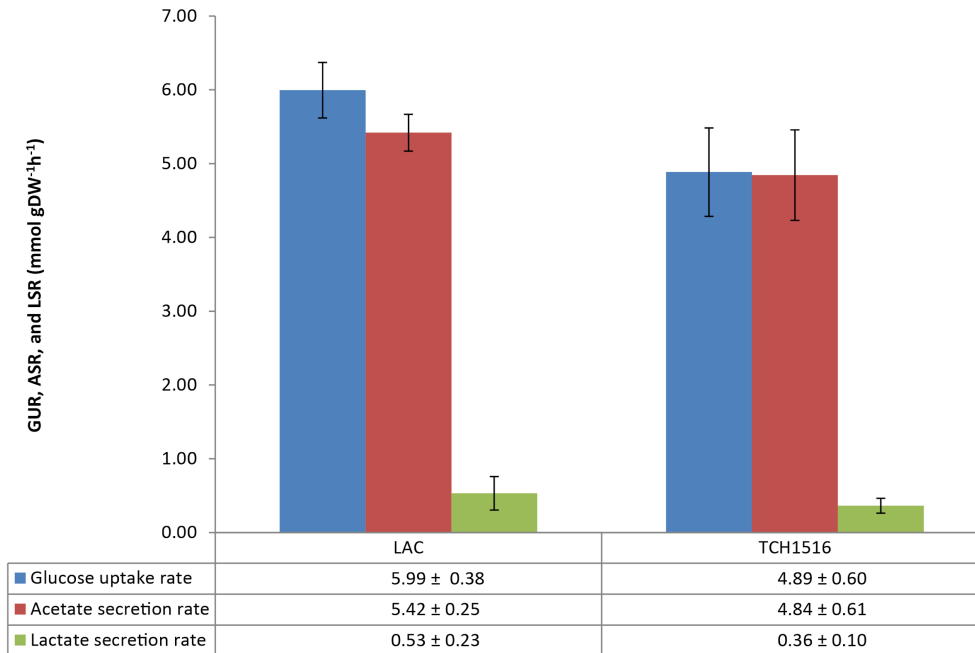

17

18 **Fig. S4.** Phenotypic characteristics of the evolved LAC and TCH1516 clones. All values  
 19 shown are calculated by averaging all replicates of the same strain (LAC and TCH1516).  
 20 The glucose uptake rates (GURs) and the acetate secretion rates (ASRs) are roughly  
 21 equivalent across both strains. The lactate secretion rates (LSRs) are relatively low  
 22 compared, but detectable.

23

24

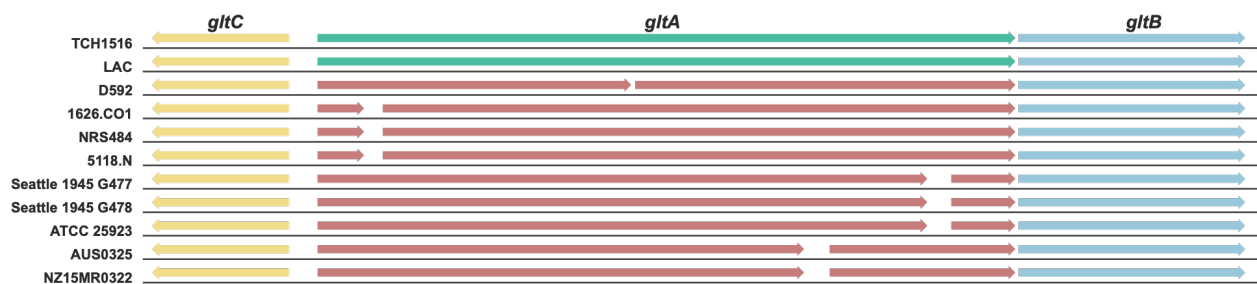

26 **Fig. S5.** Alignment of the *glt* operon of *Staphylococcus aureus* studied strains (TCH1516,  
 27 LAC, and D592) and other strains identified to also have a disrupted glutamate synthase  
 28 gene (*gltA*).

29 **Table S1.** Strains used in this study. Y - yes, phenotypically characterized; N - no, not  
 30 phenotypically characterized.

| Strain      | Description                         | # Flask | Phenotypically characterized (growth/MIC) | Biosample Accession number |
|-------------|-------------------------------------|---------|-------------------------------------------|----------------------------|
| LAC         | Wild type                           | -       | Y/Y                                       |                            |
| TCH1516     | Wild type                           | -       | Y/Y                                       | SAMN00253845               |
| D592        | Wild type                           | -       | N/N                                       |                            |
| LAC A3      | LAC strain evolved in SMM media     | 51      | Y/N                                       | SAMN10712247               |
| LAC A4      | LAC strain evolved in SMM media     | 52      | Y/N                                       | SAMN10712248               |
| LAC A5      | LAC strain evolved in SMM media     | 70      | N/N                                       | SAMN10712249               |
| LAC A6      | LAC strain evolved in SMM media     | 51      | N/N                                       | SAMN10712250               |
| LAC A7      | LAC strain evolved in SMM media     | 69      | Y/Y                                       | SAMN10712251               |
| LAC A9      | LAC strain evolved in SMM media     | 62      | N/N                                       | SAMN10712252               |
| LAC A10     | LAC strain evolved in SMM media     | 62      | N/N                                       | SAMN10712253               |
| TCH1516 A11 | TCH1516 strain evolved in SMM media | -       | N/N                                       | -                          |
| TCH1516 A13 | TCH1516 strain evolved in SMM media | 48      | N/N                                       | SAMN10712254               |
| TCH1516 A14 | TCH1516 strain evolved in SMM media | 60      | Y/N                                       | SAMN10712255               |
| TCH1516 A15 | TCH1516 strain evolved in SMM media | 40      | N/N                                       | SAMN10712256               |
| TCH1516 A16 | TCH1516 strain evolved in SMM media | 58      | N/N                                       | SAMN10712257               |
| TCH1516 A18 | TCH1516 strain evolved in SMM media | 48      | N/N                                       | SAMN10712258               |
| TCH1516 A19 | TCH1516 strain evolved in SMM media | 57      | Y/Y                                       | SAMN10712259               |
| TCH1516 A20 | TCH1516 strain evolved in SMM media | 58      | Y/N                                       | SAMN10712260               |
| D592 A25    | D592 strain evolved in SMM media    | 19      | Y/N                                       | SAMN10712261               |
| D592 A30    | D592 strain evolved in SMM media    | 8       | N/N                                       | SAMN10712262               |
| D592 A35    | D592 strain evolved in SMM media    | 16      | N/N                                       | SAMN10712263               |

31

32 **Table S2.** Key mutations identified in TCH1516 evolved strains, their products/function  
 33 and occurrences.

34 ALE identification numbers are reported and when followed by 'p', indicate evidence of  
 35 the mutation only in respective ALE populations and not in clones.

36

37 *dtpT* - POT family proton (H<sup>+</sup>)-dependent oligopeptide transporter; *fliA* - DNA-directed  
 38 RNA polymerase sigma subunit FliA; *ecfT* - ABC superfamily ATP binding cassette  
 39 transporter, ABC protein.

40

| Gene                                                             | Position | Mutation Type | Sequence Change | Details            | #ALE (p - population) |
|------------------------------------------------------------------|----------|---------------|-----------------|--------------------|-----------------------|
| <b><i>spoVG</i></b><br>(stage V sporulation protein G)           | 532,912  | SNP           | A→T             | R7* (AGA→TGA)      | A15                   |
|                                                                  | 532,916  | SNP           | T→A             | L8H (CTT→CAT)      | A14                   |
|                                                                  | 532,968  | INS           | +T              | coding (75/303 nt) | A11                   |
|                                                                  | 533,042  | SNP           | A→T             | K50I (AAA→ATA)     | A19                   |
|                                                                  | 533,074  | SNP           | G→C             | A61P (GCG→CCG)     | A16                   |
|                                                                  | 533,080  | SNP           | C→A             | P63T (CCT→ACT)     | A20                   |
|                                                                  | 533,090  | SNP           | C→A             | S66* (TCA→TAA)     | A13                   |
| <b>USA300HOU_0709</b><br>(MarR family transcriptional regulator) | 760,322  | SNP           | C→A             | R92L (CGT→CTT)     | A13p                  |
|                                                                  | 760,340  | SNP           | C→G             | R86P (CGT→CCT)     | A19                   |
|                                                                  | 760,376  | SNP           | T→A             | K74I (AAA→ATA)     | A14                   |
|                                                                  | 760,404  | SNP           | C→A             | D65Y (GAT→TAT)     | A11p                  |
|                                                                  | 760,466  | SNP           | A→T             | L44* (TTA→TAA)     | A16                   |
|                                                                  | 760,470  | SNP           | C→A             | V43F (GTC→TTC)     | A15                   |

|                                                                                  |           |     |         |                         |                      |
|----------------------------------------------------------------------------------|-----------|-----|---------|-------------------------|----------------------|
| <i>dtpT</i>                                                                      | 804,025   | SNP | T→A     | I351F (ATT→TTT)         | A11p, A16p, A19, A20 |
| <i>fliA</i>                                                                      | 2,185,439 | SNP | C→A     | R241L (CGA→CTA)         | A18                  |
|                                                                                  | 2,185,713 | DEL | Δ3 bp   | coding (446-448/771 nt) | A15                  |
|                                                                                  | 2,186,106 | SNP | A→C     | W19G (TGG→GGG)          | A16                  |
| <i>rsbU</i><br>(sigma factor B regulator)                                        | 2,187,358 | DEL | Δ1 bp   | coding (705/1002 nt)    | A11p                 |
|                                                                                  | 2,187,404 | SNP | G→C     | A220G (GCT→GGT)         | A13p                 |
|                                                                                  | 2,187,658 | SNP | A→T     | Y135* (TAT→TAA)         | A14                  |
|                                                                                  | 2,187,720 | SNP | G→A     | Q115* (CAA→TAA)         | A19                  |
| <i>ecfT</i>                                                                      | 2,357,045 | SNP | C→T     | E2E (GAG→GAA)           | A15                  |
|                                                                                  | 2,357,046 | SNP | T→A     | E2V (GAG→GTG)           | A14                  |
| <i>bioW</i><br>(6-carboxyhexanoate-CoA ligase)                                   | 2,546,229 | INS | +C      | coding (678/678 nt)     | A18                  |
|                                                                                  | 2,546,230 | SNP | T→C     | *226W (TAG→TGG)         | A16                  |
|                                                                                  | 2,546,231 | SNP | A→T     | *226K (TAG→AAG)         | A11p, A15p, A19      |
| <i>bioD</i> ,<br>USA300HOU_2412<br>(dethiobiotin synthase, ABC membrane protein) | 2,551,111 | SNP | T→A     | intergenic (-55/+397)   | A15, A16, A20        |
|                                                                                  | 2,551,111 | SUB | 2 bp→AT | intergenic (-55/+396)   | A19                  |
|                                                                                  | 2,551,118 | SNP | C→A     | intergenic (-62/+390)   | A20                  |
|                                                                                  | 2,551,125 | SNP | T→G     | intergenic (-69/+383)   | A13, A14             |
| USA300HOU_2595<br>(APC family amino acid-polyamine-organocation transporter)     | 2,739,781 | SNP | G→A     | G91D (GGT→GAT)          | A19                  |
|                                                                                  | 2,739,840 | SNP | T→A     | W111R (TGG→AGG)         | A14                  |
|                                                                                  | 2,740,512 | SNP | G→A     | A335T (GCA→ACA)         | A15                  |
|                                                                                  | 2,740,561 | SNP | C→A     | S351* (TCA→TAA)         | A16                  |

41 **Table S3.** Key mutations identified in LAC evolved strains, their products/function and occurrences.

42 ALE identification numbers are reported and when followed by 'p', indicate evidence of the mutation

43 only in respective ALE populations and not in clones. § denotes possibility of being present in the  
 44 starting strain, therefore not being an adaptive key mutation.

45

46 *dtpT* - POT family proton (H<sup>+</sup>)-dependent oligopeptide transporter; *fliA* - DNA-directed RNA

47 polymerase sigma subunit FliA.

| Gene                                                                                             | Position  | Mutation Type | Sequence Change | Details                | #ALE                           |
|--------------------------------------------------------------------------------------------------|-----------|---------------|-----------------|------------------------|--------------------------------|
| <i>poIA_2</i><br>(DNA polymerase I)                                                              | 514,525   | SNP           | G→T             | R616I (AGA→ATA)        | A4, A9, A10p                   |
| <i>ebpS</i> ,<br>LAC_H_00573<br>(Elastin-binding protein,<br>Glucosaminat<br>ammonia-lyase)      | 559,049   | SNP           | C→T             | intergenic (+77/-325)  | A4, A9, A10p                   |
| <i>slyA_1</i> ,<br>LAC_H_01002<br>(Transcriptional<br>regulator<br>SlyA/hypothetical<br>protein) | 1,052,459 | SNP           | A→T             | intergenic (-14/-139)  | A9p                            |
|                                                                                                  | 1,052,460 | SNP           | C→A             | intergenic (-15/-138)  | A4, A5, A9                     |
| § <i>leuA_1</i><br>(2-<br>isopropylmalate<br>synthase)                                           | 1,129,558 | SNP           | A→T             | N20K (AAT→AAA)         | A3, A4, A5, A6,<br>A7, A9, A10 |
| § <i>nrdI</i> , <i>ribN</i><br>(Protein NrdI,<br>Riboflavin<br>transporter)                      | 1,302,769 | INS           | +A              | intergenic (-505/-295) | A3, A4, A5, A6,<br>A7, A9, A10 |
| <i>dtpT</i>                                                                                      | 1,304,808 | SNP           | C→G             | S6S (TCC→TCG)          | A5                             |
|                                                                                                  | 1,305,841 | SNP           | A→T             | I351F (ATT→TTT)        | A5, A9, A10                    |
| <i>rpoC</i><br>(DNA-directed<br>RNA polymerase<br>subunit beta)                                  | 1,512,105 | SNP           | G→A             | A1177V (GCT→GTT)       | A5                             |
|                                                                                                  | 1,514,860 | SNP           | G→C             | R259G (CGT→GGT)        | A5                             |
|                                                                                                  | 1,514,895 | SNP           | C→T             | G247E (GGA→GAA)        | A10                            |

|                                                                                                                                        |           |     |       |                         |            |
|----------------------------------------------------------------------------------------------------------------------------------------|-----------|-----|-------|-------------------------|------------|
| <b><i>ftsH</i></b><br><b>(ATP-dependent zinc metalloprotease FtsH)</b>                                                                 | 1,561,825 | DEL | Δ1 bp | coding (2063/2094 nt)   | A3         |
|                                                                                                                                        | 1,561,827 | SNP | T→A   | K687N (AAA→AAT)         | A3         |
|                                                                                                                                        | 1,562,920 | SNP | G→A   | P323L (CCA→CTA)         | A6         |
|                                                                                                                                        | 1,563,782 | SNP | T→A   | T36S (ACA→TCA)          | A6p        |
| <b><i>spoVG</i></b><br><b>(Putative septation protein SpoVG)</b>                                                                       | 1,578,164 | SNP | G→T   | P63T (CCT→ACT)          | A10        |
|                                                                                                                                        | 1,578,208 | SNP | G→A   | P48L (CCA→CTA)          | A4         |
|                                                                                                                                        | 1,578,209 | SNP | G→T   | P48T (CCA→ACA)          | A5         |
|                                                                                                                                        | 1,578,275 | INS | +A    | coding (76/303 nt)      | A9         |
| <b><i>yhdG_2</i></b><br><b>(putative amino acid permease YhdG)</b>                                                                     | 2,244,291 | SNP | G→A   | R410C (CGT→TGT)         | A7p        |
|                                                                                                                                        | 2,244,313 | SNP | T→A   | L402F (TTA→TTT)         | A6         |
|                                                                                                                                        | 2,244,413 | SNP | A→G   | L369P (CTT→CCT)         | A7p        |
|                                                                                                                                        | 2,244,426 | SNP | C→T   | A365T (GCA→ACA)         | A6         |
|                                                                                                                                        | 2,244,610 | SNP | C→T   | W303* (TGG→TGA)         | A9         |
|                                                                                                                                        | 2,244,998 | SNP | G→T   | S174* (TCA→TAA)         | A3         |
|                                                                                                                                        | 2,245,301 | SNP | G→A   | A73V (GCT→GTT)          | A4         |
| <b>LAC_H_02272, <i>bioD1</i></b><br><b>(putative ABC transporter ATP-binding protein, ATP-dependent dethiobiotin synthetase BioD1)</b> | 2,433,905 | SNP | A→C   | intergenic (+383/-69)   | A4, A7, A9 |
|                                                                                                                                        | 2,433,912 | SNP | G→T   | intergenic (+390/-62)   | A10        |
|                                                                                                                                        | 2,433,919 | SNP | A→T   | intergenic (+397/-55)   | A10        |
|                                                                                                                                        | 2,433,926 | SNP | A→T   | intergenic (+404/-48)   | A5, A10p   |
| <b><i>bioW</i></b><br><b>(6-carboxyhexanoate-CoA ligase)</b>                                                                           | 2,438,797 | DEL | Δ3 bp | coding (689-691/693 nt) | A3         |
|                                                                                                                                        | 2,438,799 | SNP | T→A   | *231K (TAG→AAG)         | A10p       |



|                                                                                                                 |           |     |     |                      |        |
|-----------------------------------------------------------------------------------------------------------------|-----------|-----|-----|----------------------|--------|
|                                                                                                                 | 2,438,800 | INS | +G  | coding (692/693 nt)  | A5p    |
|                                                                                                                 | 2,438,800 | SNP | A→G | *231W (TAG→TGG)      | A7p    |
| <b><i>rhaS</i></b><br><b>(HTH-type<br/>transcriptional<br/>activator <i>RhaS</i>)</b>                           | 2,571,420 | SNP | G→T | R377I (AGA→ATA)      | A5, A7 |
| <b><i>ecfA1</i></b><br><b>(Energy-coupling<br/>factor transporter<br/>ATP-binding<br/>protein <i>EcfA1</i>)</b> | 2,627,985 | SNP | G→A | E2E (GAG→GAA)        | A7p    |
|                                                                                                                 | 2,628,048 | SNP | C→G | F23L (TTC→TTG)       | A5p    |
| <b><i>rsbU</i></b><br><b>(Phosphoserine<br/>phosphatase<br/><i>RsbU</i>)</b>                                    | 2,797,241 | SNP | C→T | Q92* (CAA→TAA)       | A6     |
|                                                                                                                 | 2,797,625 | SNP | G→A | A220T (GCT→ACT)      | A3     |
|                                                                                                                 | 2,797,930 | INS | +T  | coding (963/1002 nt) | A7     |

49 **Table S4.** Key mutations identified in D592 evolved strains, their products/function and  
 50 occurrences.

51 § denotes possibility of being present in the starting strain, therefore not being an  
 52 adaptive key mutation.

| Gene                                                                    | Position  | Mutation Type | Sequence Change | Details                  | #ALE          |
|-------------------------------------------------------------------------|-----------|---------------|-----------------|--------------------------|---------------|
| <i>codY</i><br>(GTP-sensing transcriptional pleiotropic repressor CodY) | 783,648   | SNP           | C→T             | G239S (GGT→AGT)          | A35           |
|                                                                         | 783,817   | DEL           | Δ60 bp          | coding (487-546/774 nt)  | A30           |
|                                                                         | 784,076   | SNP           | G→A             | T96I (ACA→ATA)           | A25           |
| §KJJPF ECL_00960<br>(Lipoate-protein ligase 1)                          | 1,023,420 | SNP           | C→G             | L22V (CTT→GTT)           | A25, A30, A35 |
| §patA_2<br>(Peptidoglycan O-acetyltransferase)                          | 1,127,647 | SNP           | T→A             | I334F (ATC→TTC)          | A25, A30, A35 |
| <i>norA</i><br>(multidrug efflux MFS transporter)                       | 1,321,058 | DEL           | Δ60 bp          | coding (839-898/1167 nt) | A25           |
|                                                                         | 1,321,658 | DEL           | Δ129 bp         | coding (170-298/1167 nt) | A30           |
|                                                                         | 1,321,906 | DEL           | Δ1 bp           | coding (50/1167 nt)      | A35           |
| <i>gltA_2</i><br>(Glutamate synthase [NADPH] large chain)               | 1,579,069 | SNP           | A→T             | *675K (TAA→AAA)          | A25           |
|                                                                         | 1,579,069 | SNP           | A→G             | *675Q (TAA→CAA)          | A30, A35      |
| §pflB<br>(Formate acetyltransferase)                                    | 1,810,242 | SNP           | T→C             | E341G (GAA→GGA)          | A25, A30, A35 |
| §KJJPF ECL_01783<br>(hypothetical protein)                              | 1,893,832 | INS           | +TT             | coding (7/183 nt)        | A25, A30, A35 |
| §yfmJ<br>(Putative NADP-dependent oxidoreductase YfmJ)                  | 2,613,600 | SNP           | A→C             | D282A (GAT→GCT)          | A25, A30, A35 |

53 **Table S6.** Evaluation of growth of transposon mutants in SMM and SMM supplemented  
 54 with glutamic acid (SMM + Glu; 250 mg/L) or biotin (SMM + Biotin; 0.1 mg/L). Strains  
 55 were grown for 72 h and growth was called when OD was above 0.3. Growth and no-  
 56 growth are indicated with plus (+) and minus (-) symbols, respectively; n.d. - non  
 57 determined. JE2 is the wild type strain used in the construction of the mutants, it is a  
 58 LAC strain curated of its plasmids.

| Strain | KO Gene     | SMM | SMM + Biotin | SMM + Glu |
|--------|-------------|-----|--------------|-----------|
| JE2    | -           | +   | +            | +         |
| NE777  | <i>bioD</i> | -   | +            | n.d.      |
| NE999  | <i>bioW</i> | -   | +            | n.d.      |
| NE390  | <i>gltA</i> | -   | n.d.         | +         |

59

60
